# Supplementary material
Source: publisher site journal article supplement (https://www.dovepress.com/get_supplementary_file.php?f=335763.docx)
Supplement: Supplementary file 1 [file get_supplementary_file.php]

**Supplementary Appendix**

**Appendix A: Detailed Program Description of the Cost Savings Reinvestment Program & Savings Calculation Methodology**

The Cost Savings Reinvestment Program (CSRP) invites individual or small teams of physicians to apply to lead a project that can reduce direct cost to the health system by an annual minimum of $50,000 sustained over two years. A two-tiered committee vets proposals for impact on patient quality and safety, likelihood to succeed, and alignment with organizational goals. Savings calculation methodologies are tailored to each project, and physicians with accepted proposals are encouraged to further develop their projects through an institutional quality improvement course. Their academic departments enter into an explicit agreement with the health system whereby successful projects (demonstrated through validated savings surpassing the annual $50,000 threshold without compromise to the quality of care) will trigger the redirection of up to 50% of attributable savings to the lead physicians’ department over the subsequent two years based on a specified distribution schedule, with 20 percent of reinvestment funds withheld until savings are shown to be sustained through year two.

Methodologies to calculate savings are tailored to each project and agreed upon prior to project initiation. Savings are tracked using internal direct cost (not charge) data as measured by the health system’s accounting software and compared with the institution’s historical baseline in a given category.

Total year one savings are reported based on the sum of validated savings for each project. Each project’s savings calculation followed the general formula in which the change in direct cost of the unit of interest (e.g. direct cost of a medication or the average cost of an inpatient admission to a given service) between the pre and post implementation periods in USD ($) is multiplied by the validated post-implementation utilization rate (# of units)*.* For example, if a project’s goal is to have physicians switch from using a more costly drug to a less costly drug, the difference in unit price (one dose) from the health system’s perspective between the two drugs is multiplied by the number of units used in the post-implementation observation period. Proprietary vendor agreements limit our ability to report individual project savings.

**Appendix B: Semi-Structured Interview Protocol for Participating Physicians**

Tell me about CSRP in your own words:

1. Are you aware of Stanford Health System’s Cost Savings Reinvestment Program (CSRP)? Can you describe what it is in your own words?
2. Do you feel physicians have a responsibility as a part of their jobs to innovate around saving money in healthcare? Why or why not?

Tell me about your participation in the program:

1. Why did you participate in the program? What aspects of the program did you find the most appealing?
2. What aspects of the program did you find the least appealing? Why do you think others have not participated in the program?
3. Tell me about your role in the CSRP project.
4. How long had you or a colleague had the idea for the intervention?
   1. *If this was a pre-existing idea,* was the idea pursued earlier? Why or why not? What barriers did you face to achieving success?
   2. *If this was a new idea,* what was your ‘ideation’ process? Did you work with colleagues or individually?
5. How will the reinvested funds be used? What role did you play in that decision?
6. Approximately how many hours did you dedicate to this project per week? Per month? Per year? What percentage of this time was uncompensated (i.e. in addition to your baseline level of work)?
7. What made the program work well? What would have made the program better?
8. Is there anything else I should know or should have asked about CSRP?

**Appendix C: Cost Savings Reinvestment Program Evaluation Interviewee Characteristics**

| **Variables** | **% Participants (n)** | **% Non-Participants (n)** |
| --- | --- | --- |
| Gender |  |  |
| Male | 63.0% (17) | 60.0% (3) |
| Female | 37.0% (10) | 40.0% (2) |
| Role | 44.4% (12) | 100.0% (5) |
| Physician |
| Chair of Department | 18.5% (5) | Not applicable |
| Administrator | 37.0% (10) | Not applicable |
| Years in Occupation | 0.0% (0) | 20.0% (1) |
| <5 Years |
| ≥5 Years | 100.0% (27) | 80.0% (4) |
| Years at Stanford | 25.9% (7) | 20.0% (1) |
| <5 Years |
| ≥5 Years | 74.1% (20) | 80.0% (4) |
| **Total** | **100.0% (27)** | **100.0% (5)** |

**Appendix D: Cost Savings Reinvestment Program Intake Checklist and Committee Endorsement Scorecard**

**Project Intake Checklist (Tier 1)**

| **Proposal Intake Checklist** | **Review Team Verification** |
| --- | --- |
| **Medical Direction** | |
| If appropriate, documentation of overlapping medical direction (roles, responsibilities and fiscal year-end deliverables) |  |
| **Clinical Impact** | |
| Does not adversely affect the following: 1) Access to health care services 2) Patient safety and quality 3) Safety of SHC physicians, clinicians, or staff |  |
| Does not limit clinicians’ ability to make medically appropriate decisions |  |
| **Financial Impact & Measurement** | |
| Does not adversely impact payor mix |  |
| Data is available to accurately track savings |  |
| Demonstrates a cost savings > $50K |  |
| Cost savings quantification endorsed by Decision Support Services |  |
| **Resources** | |
| Request for SHC support resources are clearly defined and are not prohibitive for implementation |  |
| **Leadership Endorsement** | |
| Endorsement of Department Chair(s) |  |
| Endorsement of Operational Leader(s) |  |

**CSRP Committee Endorsement Scorecard (Tier 2)**

| **Date:**  **Considerations for Committee Endorsement** | **Score Possibilities (0 to 3)** (Any score of 0 may disqualify proposal for further consideration) |
| --- | --- |
| **Current Medical Direction** | |
| **Overlap with pre-existing medical director roles, responsibilities, and fiscal year-end deliverables** 0 = Considerable overlap with current medical direction 1 = No overlap identified |  |
| **Physician Engagement** | |
| **Origin of the opportunity** 1 = SHC identified opportunity requiring physician engagement  2 = Physician and SHC jointly identified opportunity 3 = Physician identified and novel opportunity |  |
| **Required physician effort** 0 = Clinical expectation 1 = Minimal effort required (<5 hours commitment)  2 = Requires change in practice, consolidation of products and/or development of operational enhancement within a department or service line 3 = Requires significant change in practice, consolidation of products and/or development of operational enhancement across the SHC enterprise |  |
| **Required clinical guidance and expertise** (Level of clinical validation and participation in strategic deployment) 1 = Minimal physician guidance and expertise required 2 = Requires significant physician guidance and expertise |  |
| **Organizational Alignment** | |
| **Alignment with organizational priorities** (e.g., part of the SHC Operational Plan or Integrated Strategic Plan) 1 = Financial strength 2 = Impacts multiple domains (Quality, Patient Experience, Engagement & Wellness) |  |
| **Impact of initiative** 1 = Minimal scope, small patient population, or minimal financial impact 2 = Three or more medical school departments/patient populations, multiple services or SHC entities, or large financial impact |  |
| **Resources** | |
| Endorsement of SHC resources to support initiative  0 = No  1 = Yes |  |
| **Total Committee Score** |  |

**Appendix E: Estimated Overhead Costs of Cost Savings Reinvestment Program**

|  | **Administrator Role** | **Reference Job Description** | **% Full time equivalent** | **# People** | **Annual Salary with Benefitsa** | **Component Cost** |
| --- | --- | --- | --- | --- | --- | --- |
| **Labor Costs** | |  |  |  |  |  |
|  | ***Program administration*** |  |  |  |  |  |
|  | Physician Lead & Program Chair | Surgeon | 0.20 | 1 | $ 461,300 | $ 92,260 |
|  | Program Manager | Medical and Health Services Managers | 1.00 | 1 | $ 220,610 | $ 220,610 |
|  | Executive Strategy support | Chief executive | 0.03 | 1 | $ 392,055 | $ 11,762 |
|  | ***Tier 1 Committee*** |  |  |  |  |  |
|  | Quality | Medical and Health Services Managers | 0.10 | 1 | $ 220,610 | $ 22,061 |
|  | Finance | Medical and Health Services Managers | 0.10 | 1 | $ 220,610 | $ 22,061 |
|  | Business analytics | Medical and Health Services Managers | 0.10 | 1 | $ 220,610 | $ 22,061 |
|  | Supply chain | Medical and Health Services Managers | 0.10 | 1 | $ 220,610 | $ 22,061 |
|  | ***Tier 2 Committee*** |  |  |  |  | $ - |
|  | Committee Voting Member - Physician | Physicians and Surgeons, All Other | 0.01 | 7 | $ 394,414 | $ 34,511 |
|  | Committee Voting Member - Administrator | Chief executive | 0.01 | 8 | $ 392,055 | $ 39,205 |
|  | Legal counsel | Lawyer | 0.01 | 1 | $ 333,788 | $ 2,086 |
| **Non-Labor Costs** | |  |  |  |  |  |
|  | Annual Celebration Lunch (Venue, food, trophies) | |  |  |  | $ 3,500 |
| **Total** | |  |  | 23 |  | $ 492,178 |

**a**Salary estimates were drawn from national data adjusted for geographic region1 and include a 37.8% upward adjustment to account for employee benefits.2

**Appendix F: Limitations of Return On Investment Calculations**

The favorable ROI derived from interview data is included as a directional estimation only and must be interpreted with caution. Its focus on year one data without an available comparator leave findings susceptible to biases including regression to the mean or a return to baseline performance following incentive removal.3 We also note significant physician and other clinical support staff time were uncompensated and therefore not included in the estimate. Furthermore, these cost-reduction efforts do not directly translate to the bottom line from the health system’s perspective.4 Actual financial outcomes will vary depending on the detailed circumstances of each individual project, particularly in the contractually-obligated reimbursements for health services that can vary widely between payers; because of this difference, some efforts may be cost-saving from an internal accounting perspective but ultimately reduce incoming revenue (e.g. recognizing when a patient whose insurance operates within the fee-for-service model can be de-escalated from the intensive care unit to a floor bed). Despite this ongoing challenge, the administrator support of the program documented in these interviews reveals the degree to which local leaders support the need to prepare for a value-oriented reimbursement environment.

**References**

1. May 2018 Metropolitan and Nonmetropolitan Area Occupational Employment and Wage Estimates: San Jose-Sunnyvale-Santa Clara, CA. U.S. Bureau of Labor Statistics. Published March 29, 2019. Accessed February 21, 2020. https://www.bls.gov/oes/2018/may/oes_41940.htm#(4)

2. News Release: Employer Costs for Employee Compensation - March 2020. U.S. Bureau of Labor Statistics. Published March 2020. Accessed February 21, 2020. www.bls.gov/news.release/pdf/ecec.pdf

3. Lester H, Schmittdiel J, Selby J, et al. The impact of removing financial incentives from clinical quality indicators: longitudinal analysis of four Kaiser Permanente indicators. *BMJ*. 2010;340(may11 1):c1898-c1898. doi:10.1136/bmj.c1898

4. Vilendrer SM, Asch SM, Anzai Y, Maggio P. An Incentive to Innovate: Improving Health Care Value and Restoring Physician Autonomy Through Physician-Directed Reinvestment. *Acad Med*. Published online July 28, 2020. doi:10.1097/ACM.0000000000003650
